# Supplementary material for: Longitudinal COVID-19 Surveillance and Characterization in the Workplace with Public Health and Diagnostic Endpoints
Source: PubMed Central journal article supplement (PMC8386432; doi:10.1128/msphere.00542-21), 2021-07-07
Supplement: msphere.00542-21-st001.pdf [file msphere.00542-21-st001.pdf]

**Supplemental Table S1.** Study evaluations.

|                            | Baseline | M, W, F | Weekly | Final |
|----------------------------|----------|---------|--------|-------|
| Consent/assent             | ×        |         |        |       |
| Survey<br>(≥ 18 years old) | ×        |         | ×      | ×     |
| Symptom diary              | ×        | ×       |        | ×     |
| Nasal swab*                | ×        | ×       |        | ×     |
| Stool swab                 | O        |         | O      | O     |
| Saliva                     | O        |         | O      | O     |
| Blood                      | O        |         | O      | O     |

\*substitute with oral swab if unable to tolerate nasal swab.

Abbreviations: M, Monday; W, Wednesday; F, Friday; O, optional.
